# Supplementary material for: Incidence and duration of type-specific human papillomavirus infection in high-risk HPV-naïve women: results from the control arm of a phase II HPV-16/18 vaccine trial
Source: PubMed Central journal article supplement — BMJ Open. 2016 Aug 26;6(8):e011371. doi: 10.1136/bmjopen-2016-011371 (PMC5013348; doi:10.1136/bmjopen-2016-011371), 2016-08-26
Supplement: bmjopen-2016-011371supp.pdf [file bmjopen-2016-011371supp.pdf]

**Supplementary Table 1: List of Independent Ethics Committees/Institutional Review Boards**

| <b>Centre number(s)*</b>              | <b>Ethics Review Board (Institution and address)</b>                                                                                                                                                                       | <b>Country</b> |
|---------------------------------------|----------------------------------------------------------------------------------------------------------------------------------------------------------------------------------------------------------------------------|----------------|
| 19                                    | Comitê de Ética em Pesquisa do Hospital Universitário Walter Cantídio da Universidade Federal do Ceará – COMEPE; Rua Capitão Francisco Pedro, 1290; Rodolfo Teófilo 60430-370- Fortaleza – Ceará                           | Brazil         |
| 21                                    | Comitê de Ética em Pesquisa da Faculdade de Ciências Médicas – UNICAMP; Caixa Postal 6111; 13083-970 – Campinas – São Paulo                                                                                                | Brazil         |
| 22                                    | Comitê de Ética em Pesquisa em Seres Humanos do Hospital de Clínicas – HCPR; Rua General Carneiro, 181; 80060-150 – Curitiba – Paraná                                                                                      | Brazil         |
| 23                                    | Comitê de Ética em Pesquisa da Secretaria Municipal de Saúde de São Paulo, Rua General Jardim, 36 – 2º. Andar, Vila Albuquerque – 01223-010, São Paulo – São Paulo                                                         | Brazil         |
| 24                                    | Grupo de Pesquisa e Pós – Graduação - Comissão Científica e Comissão de Pesquisa e Ética em Saúde – Hospital de Clínicas de Porto Alegre, Rua Ramiro Barcelos, 2350 2º andar, 90035-003 – Porto Alegre – Rio Grande do Sul | Brazil         |
| 17                                    | Health Research Ethics Board Dr. D. Morrish; Health Research Ethics Board; 2J2.27 Walter Mackenzie Center, University of Alberta<br>Edmonton, AB T6G 2R7                                                                   | Canada         |
| 18                                    | Research Ethics Board, Sunnybrook Campus, Phillip Herbert, MD, The Research Building, 2075 Bayview Ave, Room S1-33, Toronto, ON, M4N 3M5                                                                                   | Canada         |
| 25                                    | University of Manitoba Biomedical Research Ethics Board; Dr. Nick Anthonisen, University of Manitoba, P126 – 770, Bannatyne Avenue<br>Winnipeg, MB R3E 0W3                                                                 | Canada         |
| 27, 28                                | Optimum Clinical Research Inc., Bill Wilson, 231 King Street East<br>Oshawa, ON L1H 1C5                                                                                                                                    | Canada         |
| 10, 70, 100,<br>110, 130,<br>320, 340 | Quorum Review IRB, 1601 Fifth Avenue, Suite 1000, Seattle, WA 98101                                                                                                                                                        | US             |
| 20                                    | Thomas Jefferson University, 1015 Walnut St, Suite 410, Philadelphia, PA<br>19107                                                                                                                                          | US             |
| 40                                    | University of Georgia, 1423 Harper Street, Bldg. #HH100, Augusta, GA 30912                                                                                                                                                 | US             |
| 50                                    | University of Louisville, 550 S. Jackson Street, Louisville, KY 40202                                                                                                                                                      | US             |
| 60                                    | Atlantic Health System/Morristown Memorial Hospital, 100 Madison Avenue<br>Morristown, NJ 07960                                                                                                                            | US             |
| 80                                    | Dartmouth Medical Center, One Medical Center Drive, Lebanon, NH 03756                                                                                                                                                      | US             |
| 90                                    | San Francisco General Hospital, 1001 Potrero Avenue, San Francisco, CA<br>94110                                                                                                                                            | US             |
| 242                                   | University of California, San Francisco, 3333 California Street, San Francisco,<br>CA 94118                                                                                                                                | US             |
| 120                                   | Marshfield Clinic, 1000 North Oak Avenue, Marshfield, WI 54449                                                                                                                                                             | US             |
| 150                                   | University of Texas, 2060 Space Park Drive, Houston, TX 77058                                                                                                                                                              | US             |
| 160                                   | University of New Mexico, 1816 Sigma Chi Rd. NE, Albuquerque, NM 87131                                                                                                                                                     | US             |

\* GSK Biologicals assigned centre number

**Supplementary Table 2:** Characteristics of the cohort of 553 women randomized to the control arm of a Phase II HPV-16/18 vaccine trial.

| <b>Variable</b>                                    | <b>Categories</b>   | <b>n (%)</b> |
|----------------------------------------------------|---------------------|--------------|
| Age                                                | < 20 years          | 215 (38.9)   |
|                                                    | ≥ 20 years          | 338 (61.1)   |
| Marital Status                                     | Married/partner     | 123 (22.2)   |
|                                                    | Single/divorced     | 427 (77.2)   |
|                                                    | <i>Missing</i>      | 3 (0.5)      |
| Country of recruitment                             | Brazil              | 248 (44.9)   |
|                                                    | U.S. or Canada      | 305 (55.1)   |
| Ethnicity                                          | Caucasian           | 384 (69.4)   |
|                                                    | Black               | 41 (7.4)     |
|                                                    | Other               | 128 (23.2)   |
| Education                                          | Less than primary   | 45 (8.1)     |
|                                                    | Primary-high school | 197 (35.6)   |
|                                                    | College or higher   | 305 (55.2)   |
|                                                    | <i>Missing</i>      | 6 (1.1)      |
| Smoking History                                    | Never               | 413 (74.7)   |
|                                                    | Former              | 46 (8.3)     |
|                                                    | Current             | 90 (16.3)    |
|                                                    | <i>Missing</i>      | 4 (0.7)      |
| Lifetime number of sex partners                    | 0-1                 | 404 (73.1)   |
|                                                    | ≥ 2                 | 63 (11.4)    |
|                                                    | <i>Missing</i>      | 86 (15.6)    |
| Age at first sexual intercourse                    | < 15 years          | 115 (20.8)   |
|                                                    | ≥ 15 years          | 338 (61.1)   |
|                                                    | <i>Missing</i>      | 100 (18.1)   |
| History of any sexually transmitted diseases (STD) | No                  | 523 (94.6)   |
|                                                    | Yes                 | 30 (5.4)     |
| History of non-STDs                                | No                  | 414 (74.9)   |
|                                                    | Yes                 | 139 (25.1)   |
| Condom Use                                         | Never               | 165 (29.8)   |
|                                                    | Regularly           | 152 (27.5)   |
|                                                    | Sometimes           | 146 (26.4)   |
|                                                    | <i>Missing</i>      | 90 (16.3)    |
| Oral contraceptive use                             | Never               | 142 (25.7)   |
|                                                    | Regularly           | 295 (53.3)   |
|                                                    | Sometimes           | 36 (6.5)     |
|                                                    | <i>Missing</i>      | 80 (14.5)    |

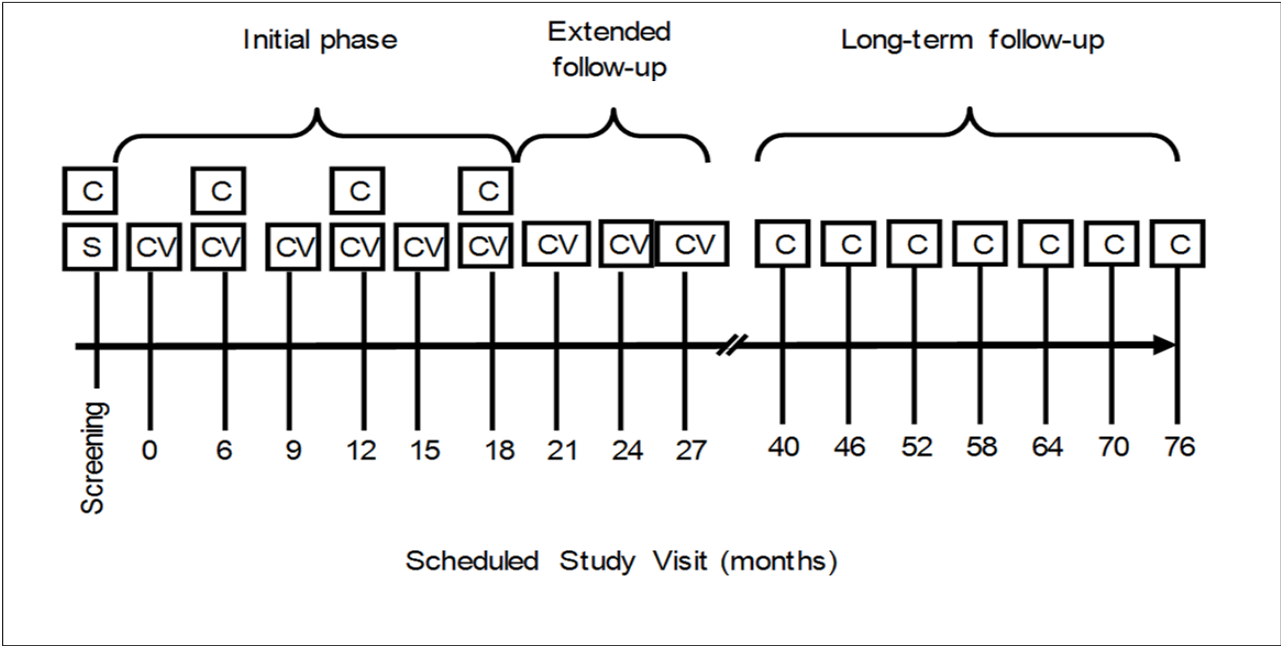

**Supplementary Figure 1:** Timeline for specimen and data collection in the cohort.

Initial and extended follow-up phases – NCT00689741 (HPV-001); long-term follow-up phase – NCT00120848 (HPV-007)

C = Cervical samples (clinician-collected); CV = cervico-vaginal samples (self-collected)

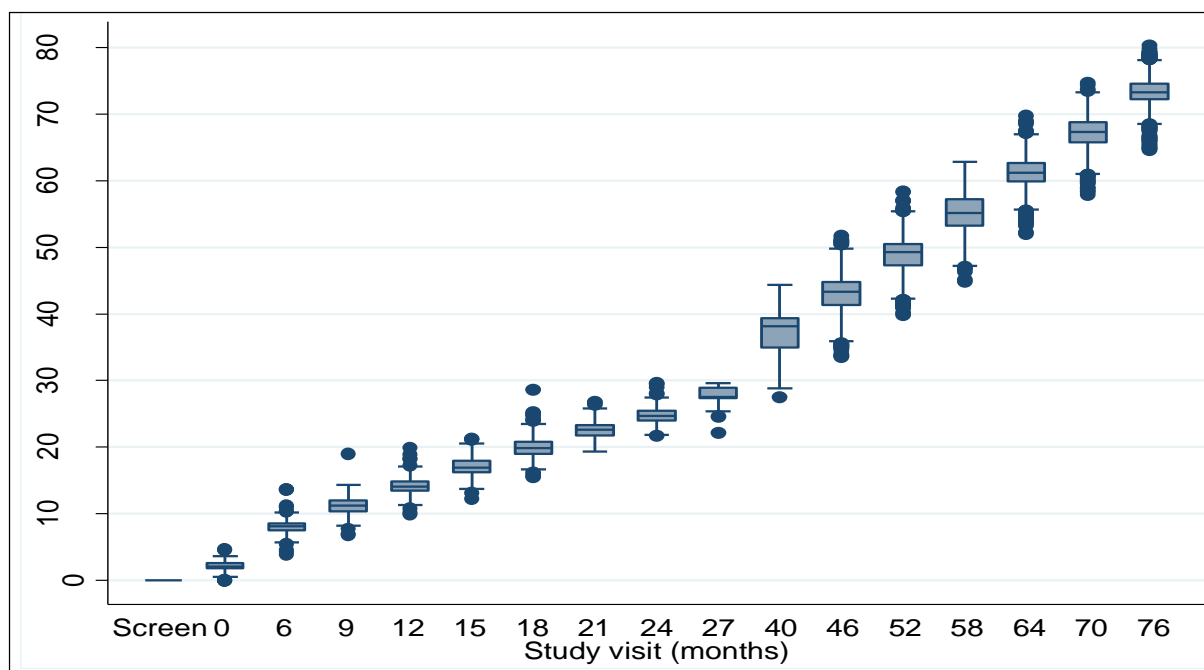

**Supplementary Figure 2:** Distribution of visit times among participants for each scheduled visit. Each box on the above Box-and-whiskers plot extends from the 25<sup>th</sup> percentile to the 75<sup>th</sup> percentile (i.e., the interquartile range); horizontal lines inside boxes represent medians. The lower adjacent value provides an estimate of the lower limit of the array and represents the first quartile value less 1.5 times the difference between the first and third quartiles. The upper adjacent value provides an estimate of the upper limit of the array and represents the third quartile value plus 1.5 times the difference between the first and third quartiles. Dots represent outliers. The number of women at each study visit was: screening visit, 553; 0 month (mo), 553; 6 mo, 518; 9 mo, 482; 12 mo, 491; 15 mo, 468; 18 mo, 478; 21 mo, 386; 24 mo, 246; 27 mo, 82; 40 mo, 382; 46 mo, 353; 52 mo, 369; 58 mo, 335; 64 mo, 347; 70 month, 325; 76 mo, 313. Detailed protocol was previously discussed [31, 32].
